# Supplementary material for: Single‐cell profiling of muscle‐infiltrating T cells in idiopathic inflammatory myopathies
Source: PubMed Central journal article supplement (PMC10565639; doi:10.15252/emmm.202217240), 2023-07-31
Supplement: EMMM-15-e17240-s010.pdf [file EMMM-15-e17240-s010.pdf]

## Single-cell profiling of muscle-infiltrating T cells in idiopathic inflammatory myopathies

Alexandra Argyriou<sup>1,2,6</sup>, Begum Horuluoglu<sup>1,2,6</sup>, Angeles Shunashy Galindo-Feria<sup>1,2,6</sup>, Juan Sebastian Diaz-Boada<sup>1,2</sup>, Merel Sijbranda<sup>1,2</sup>, Antonella Notarnicola<sup>1,2,3</sup>, Lara Dani<sup>1,3</sup>, Annika van Vollenhoven<sup>1,2</sup>, Daniel Ramsköld<sup>4</sup>, Inger Nennesmo<sup>5</sup>, Maryam Dastmalchi<sup>1,2,3</sup>, Ingrid E. Lundberg<sup>1,2,3</sup>, Lina-Marcela Diaz-Gallo<sup>1,2,7</sup> and Karine Chemin<sup>1,2,7</sup>

<sup>1</sup>Division of Rheumatology, Department of Medicine, Solna, Karolinska Institutet, Stockholm, Sweden

<sup>2</sup>Center for Molecular Medicine, Karolinska Institutet, Stockholm, Sweden

<sup>3</sup>Department of Gastro, Dermatology and Rheumatology, Karolinska University Hospital, Stockholm, Sweden

<sup>4</sup>Department of Cell and Molecular Biology, Karolinska Institutet, Stockholm, Sweden

<sup>5</sup>Department of Pathology, Karolinska University Hospital, Stockholm, Sweden.

<sup>6</sup>co-first authors contributed equally to this manuscript, and each has the right to list themselves first in author order on their CVs

<sup>7</sup>equal senior contribution

### Correspondence to:

Karine Chemin ([karine.chemin@ki.se](mailto:karine.chemin@ki.se))

The authors declare that they have no conflict of interest.

## **TABLE OF CONTENT**

**Appendix Figure S1: Immune infiltrates in muscle biopsies from 6 patients with Idiopathic inflammatory myopathies and one patient with undefined myopathy**

**Appendix Figure S2: Flow cytometry gating strategy**

**Appendix Figure S3: Workflow representing the Smart-seq2 single-cell sequencing methodology**

**Appendix Table S1: Reagents**

**Appendix Table S2: Characteristics of additional patients with IIM from whom muscle biopsies were used for immunofluorescence and immunohistochemistry stainings**

# Appendix Figure S1

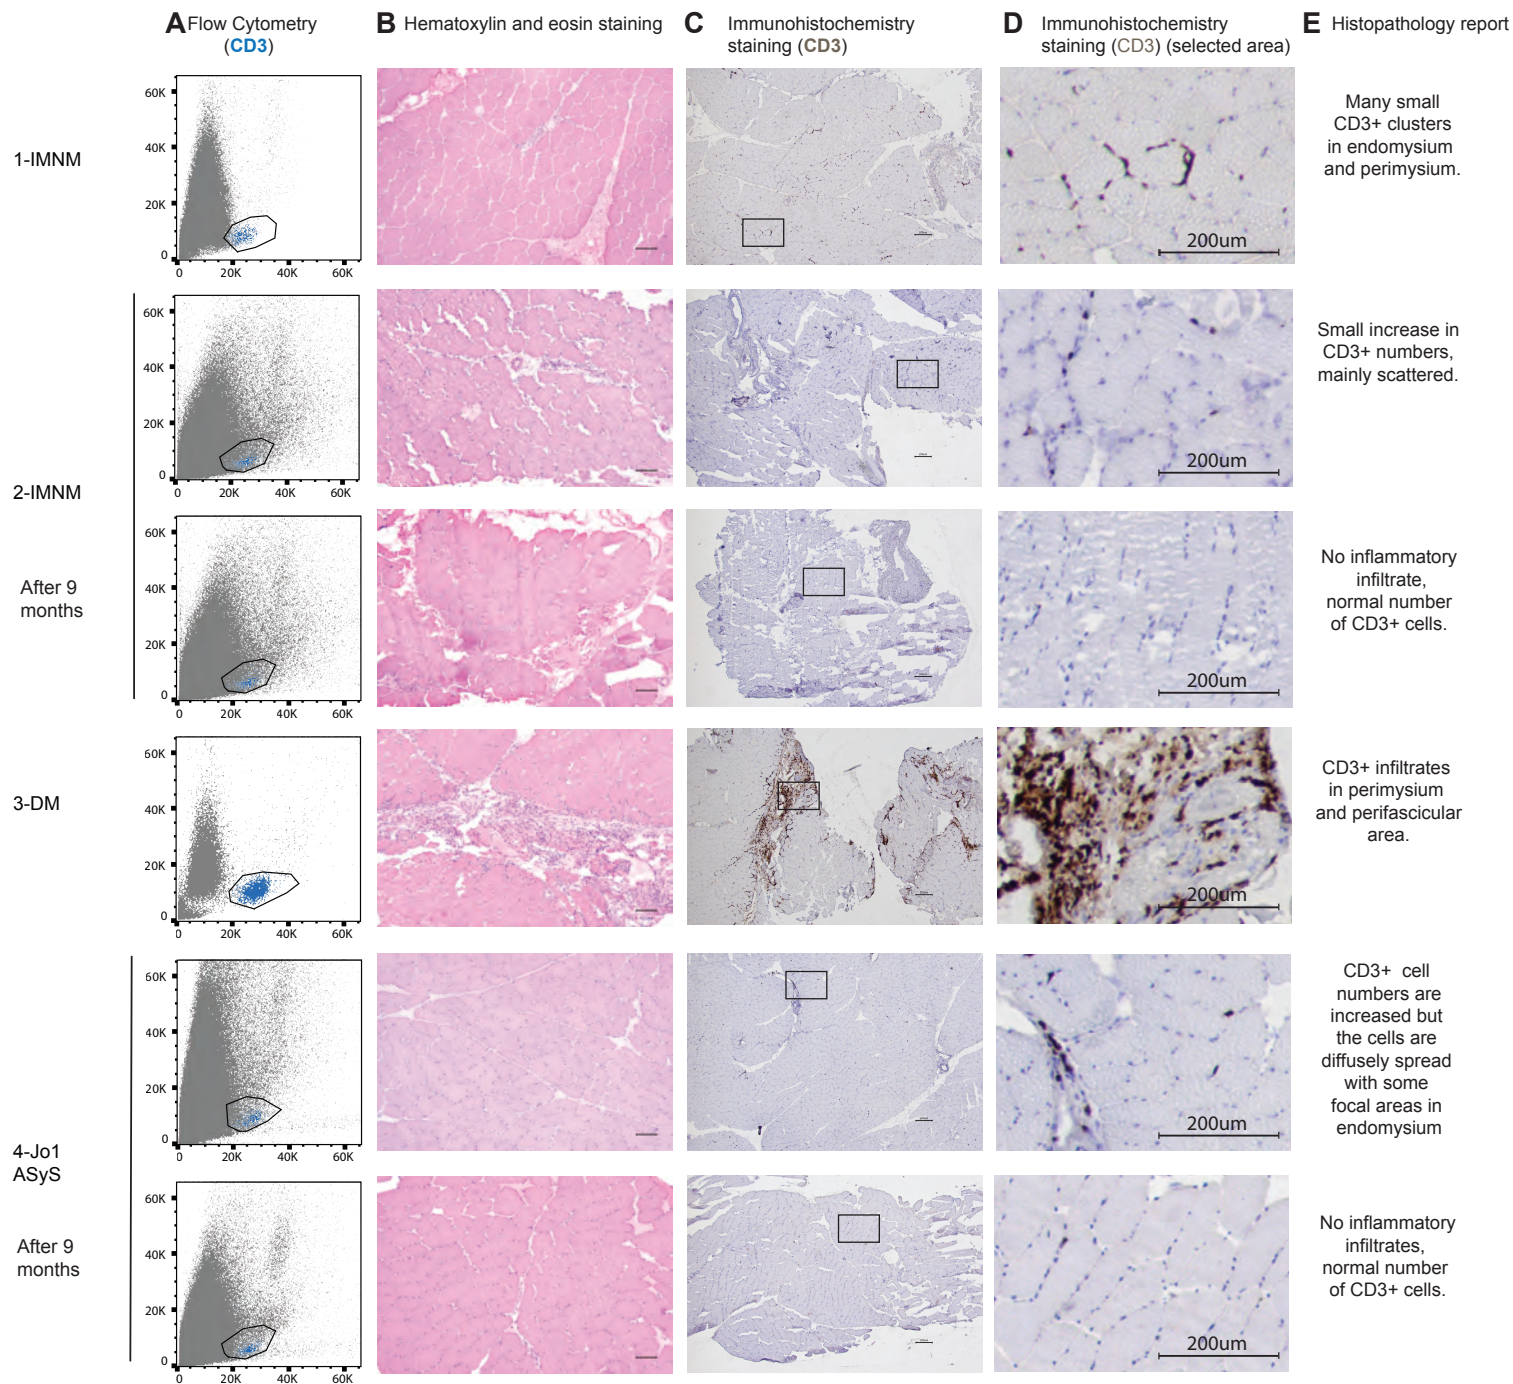

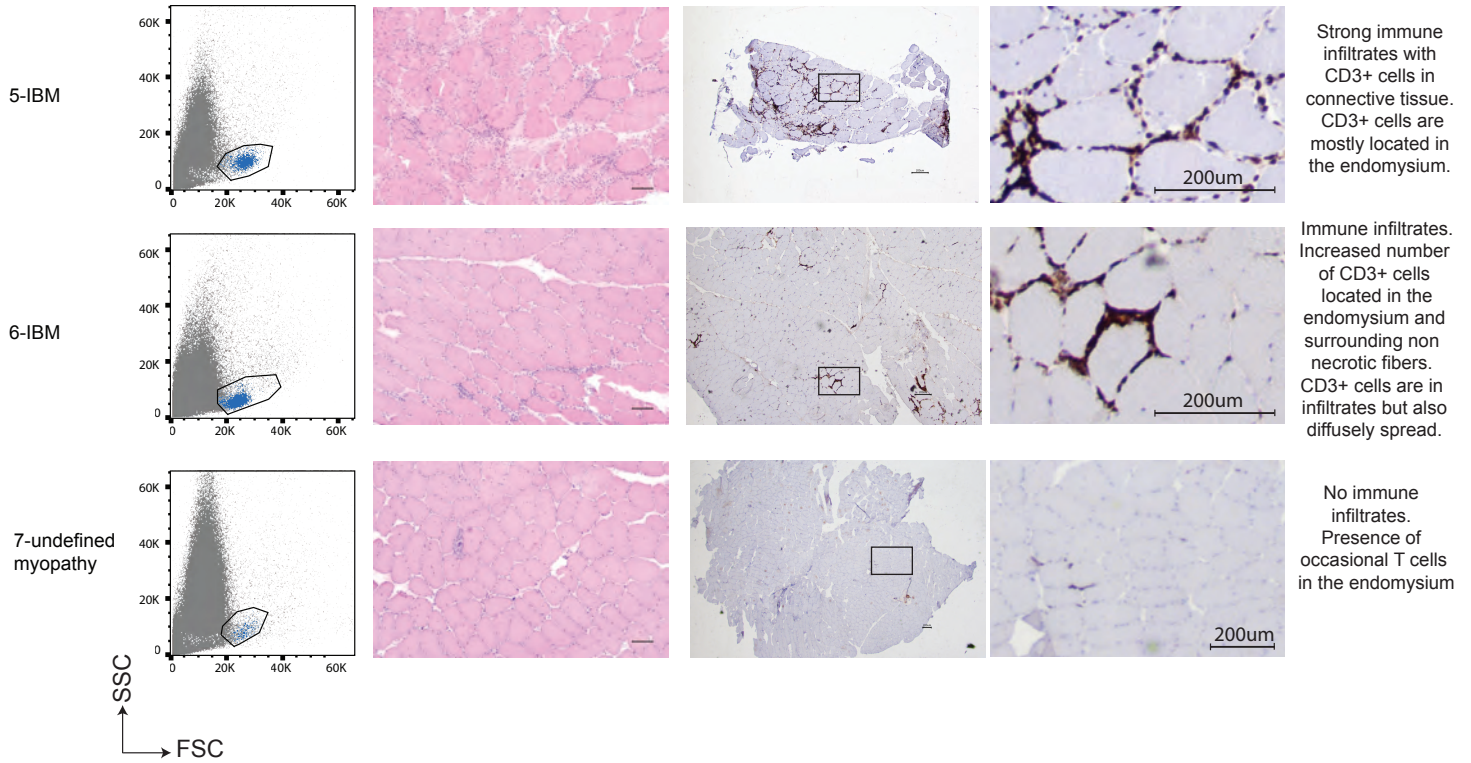

**Appendix Figure S1. Immune infiltrates in muscle biopsies from six patients with myositis (1-6) and one patient with undefined myopathy (7).** **A)** Flow cytometry plot showing CD45+CD3+ lymphocyte infiltrates (in blue) in muscle biopsies. **B)** Hematoxylin and eosin staining of muscle biopsies, scale bar=100um. **C)** Immunohistochemistry staining showing CD3+ lymphocytes (in brown), scale bar=200um **D)** selected square area from **C)** show examples of T cell infiltrates. **E)** Histopathology report. SSC: side scatter, FSC: forward side scatter. IMNM: Immune-Mediated Necrotizing Myopathy; DM: DermatoMyositis; ASyS: AntiSYnthesase Syndrome; IBM: Inclusion Body Myositis.

# Appendix Figure S2

**A**

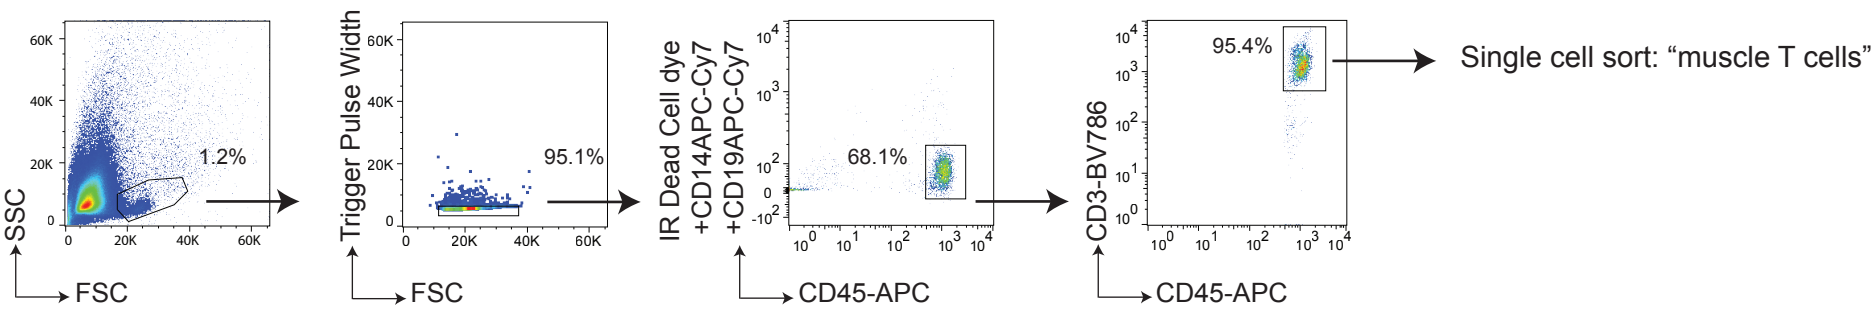

**B**

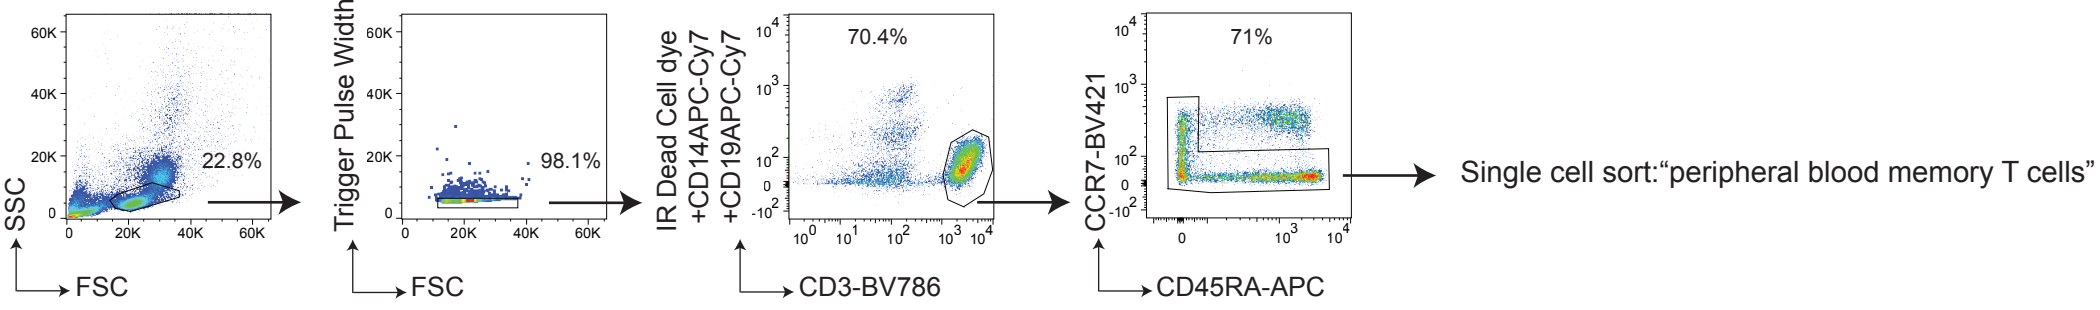

**C**

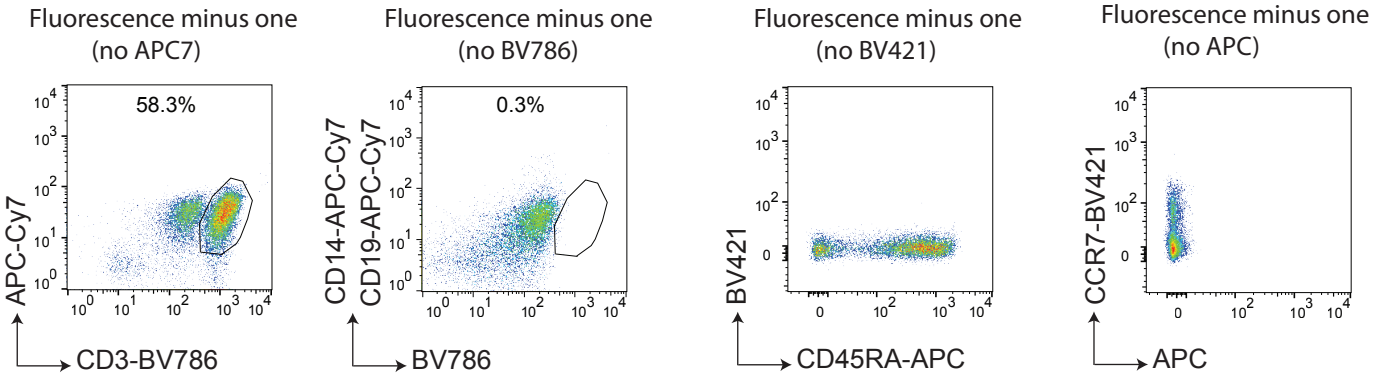

**Appendix Figure S2. A)** Flow cytometry gating strategy for single cell sorting of T cells from muscle biopsy included lymphocyte gating (based on forward and side scatter) followed by doublets, CD14+, CD19+ and dead cells exclusion. CD45+ CD3+ T cells were then further selected. Representative patient 6-IBM depicted. **B)** Flow cytometry gating strategy for single cell sorting of memory T cells from peripheral blood included lymphocyte gating (based on forward and side scatter) followed by doublets, CD14+, CD19+ and dead cells exclusion. CD3+ and memory T cells were then further selected (by excluding CCR7+ CD45RA+ cells). Representative patient 6-IBM depicted. **C)** Fluorescence minus one controls performed on peripheral blood from an healthy donor.



Appendix Table S1. Reagents

| <b>Flow cytometry single cell sorting antibodies</b> |                     |              |                 |                  |
|------------------------------------------------------|---------------------|--------------|-----------------|------------------|
| <b>Antibody</b>                                      | <b>Fluorochrome</b> | <b>Clone</b> | <b>Source</b>   | <b>Reference</b> |
| CD3                                                  | BV786               | SK7          | BD Bioscience   | 563800           |
| CD4                                                  | APC                 | RPAT4        | BD Bioscience   | 561841           |
| CD4                                                  | BV421               | RPAT4        | BD Bioscience   | 562424           |
| CD8                                                  | BB515               | RPAT8        | BD Bioscience   | 564526           |
| CCR7                                                 | BV421               | G043H7       | Biologend       | 353208           |
| CD45RA                                               | PECY7               | L48          | BD Bioscience   | 337186           |
| CD45                                                 | APC                 | HI30         | BD Bioscience   | 561864           |
| CD14                                                 | APC-H7              | MΦP9         | BD Bioscience   | 560180           |
| CD19                                                 | APC-H7              | SJ25C1       | BD Bioscience   | 560177           |
| gd                                                   | PE                  | REA 591      | Miltenyi Biotec | 130-114-038      |

| <b>Confocal antibodies</b>   |                     |              |                        |                  |
|------------------------------|---------------------|--------------|------------------------|------------------|
| <b>Antibody</b>              | <b>Fluorochrome</b> | <b>Clone</b> | <b>Source</b>          | <b>Reference</b> |
| mouse anti-human CD3         | unconjugated        | SK7          | BD Bioscience          | 347340           |
| rabbit anti-human HOBIT      | unconjugated        | polyclonal   | ThermoFisher           | PA5-54902        |
| rabbit anti-human Dystrophin | Alexa Fluor 647     | monoclonal   | abcam                  | ab282171         |
| mouse IgG1                   | unconjugated        | monoclonal   | DAKO                   | X0931            |
| rabbit IgG                   | unconjugated        | polyclonal   | Invitrogen             | 02-6102          |
| goat anti-mouse              | Alexa Fluor 488     | polyclonal   | ThermoFisher           | A-11029          |
| goat anti-rabbit             | Alexa Fluor 647     | polyclonal   | Cell Signaling         | 4414             |
| donkey anti-rabbit           | Cy3                 | polyclonal   | Jackson Immunoresearch | 711-165-152      |

**Dyes**

| <b>Name</b>                 | <b>Source</b> | <b>Reference</b> |
|-----------------------------|---------------|------------------|
| Hoeschst 333342             | ThermoFischer | 3570             |
| Near-IR Dead Cell Stain Kit | Invitrogen    | L10119           |

Appendix Table S2. Characteristics of additional patients used for immunofluorescence and immunohistochemistry stainings

| Patient number | Diagnosis | Age interval at onset | Disease duration at time of biopsy (months) | Manual Muscle Testing (MMT8) (a) | Extramuscular global assessment (VAS) (b) | PhyGA (VAS) (c) | Health Assessment Questionnaire (HAQ)(d) | Health-related quality of life EQ-5D-5L (e) | Creatinine Kinase (CK, microcat/l) | Extra-muscular manifestations | Myositis-specific autoantibodies (MSA) | Antinuclear Antibodies (ANA) | Treatment at time of biopsy | Histology report                                         | Flow cytometry immune infiltrate (f) | Biopsy location           |
|----------------|-----------|-----------------------|---------------------------------------------|----------------------------------|-------------------------------------------|-----------------|------------------------------------------|---------------------------------------------|------------------------------------|-------------------------------|----------------------------------------|------------------------------|-----------------------------|----------------------------------------------------------|--------------------------------------|---------------------------|
| 16             | IBM       | 70-75                 | 120                                         | 66                               | 32                                        |                 | NA                                       | 0.552                                       | 5.6                                | Dysphagia                     | negative                               | Negative                     | Methotrexate                | -MHCI in several fibers - CD3 and CD8 in necrotic fibers | NA                                   | Anterior tibialis (right) |
| 17             | IBM       | 65-70                 | 24                                          | 45                               | 20                                        |                 | NA                                       | NA                                          | 6.6                                |                               | SSA/SSB+                               | ANA+                         | Methotrexate                | NA                                                       | NA                                   | Vastus lateralis (left)   |
| 18             | IBM       | 60-65                 | 24                                          | 68                               | NA                                        |                 | NA                                       | NA                                          | 5.4                                |                               | NA                                     | NA                           | Azathioprine                | -MHCI staining - CD3 cell infiltration                   | NA                                   | Vastus lateralis (right)  |
